# Supplementary material for: Dynamics of fluorinated imide-based ionic liquids using nuclear magnetic resonance techniques
Source: Royal Society of Chemistry journal article supplement (doi:10.1039/d4cp03166k), 2025-01-01
Supplement: d4cp03166k1.pdf [file d4cp03166k1.pdf]

## Supplementary Information

### Dynamics of fluorinated imide-based ionic liquids using Nuclear Magnetic Resonance techniques

Tawhid Pranto<sup>a,b</sup>, Carla C. Fraenza<sup>c,\*1</sup>, Frederik Philippi<sup>d</sup>, Daniel Rauber<sup>e</sup>, Christopher W. M. Kay<sup>e,f</sup>, Tom Welton<sup>d</sup>, Steven G. Greenbaum<sup>a,c</sup>, Sophia Suarez<sup>a,b,\*</sup>

<sup>a</sup>Department of Physics, The Graduate Center of CUNY, New York, NY, USA.

<sup>b</sup>Department of Physics, Brooklyn College of CUNY, New York, NY, USA.

<sup>c</sup>Department of Physics & Astronomy, Hunter College of CUNY, New York, NY, USA.

<sup>d</sup>Department of Chemistry, Molecular Sciences Research Hub, Imperial College London, London, UK.

<sup>e</sup>Department of Chemistry, Saarland University, Saarbrücken, Germany.

<sup>f</sup>London Centre for Nanotechnology, University College London, London, UK.

\*Corresponding authors

E-mail: carla.cecilia.fraenza@unc.edu.ar (Carla C. Fraenza),

snsuarez@brooklyn.cuny.edu (Sophia Suarez).

<sup>1</sup>Present address: IFEG-CONICET and National University of Cordoba, Cordoba, Argentina.

## 1. Self-diffusion coefficients measured by PFG-NMR

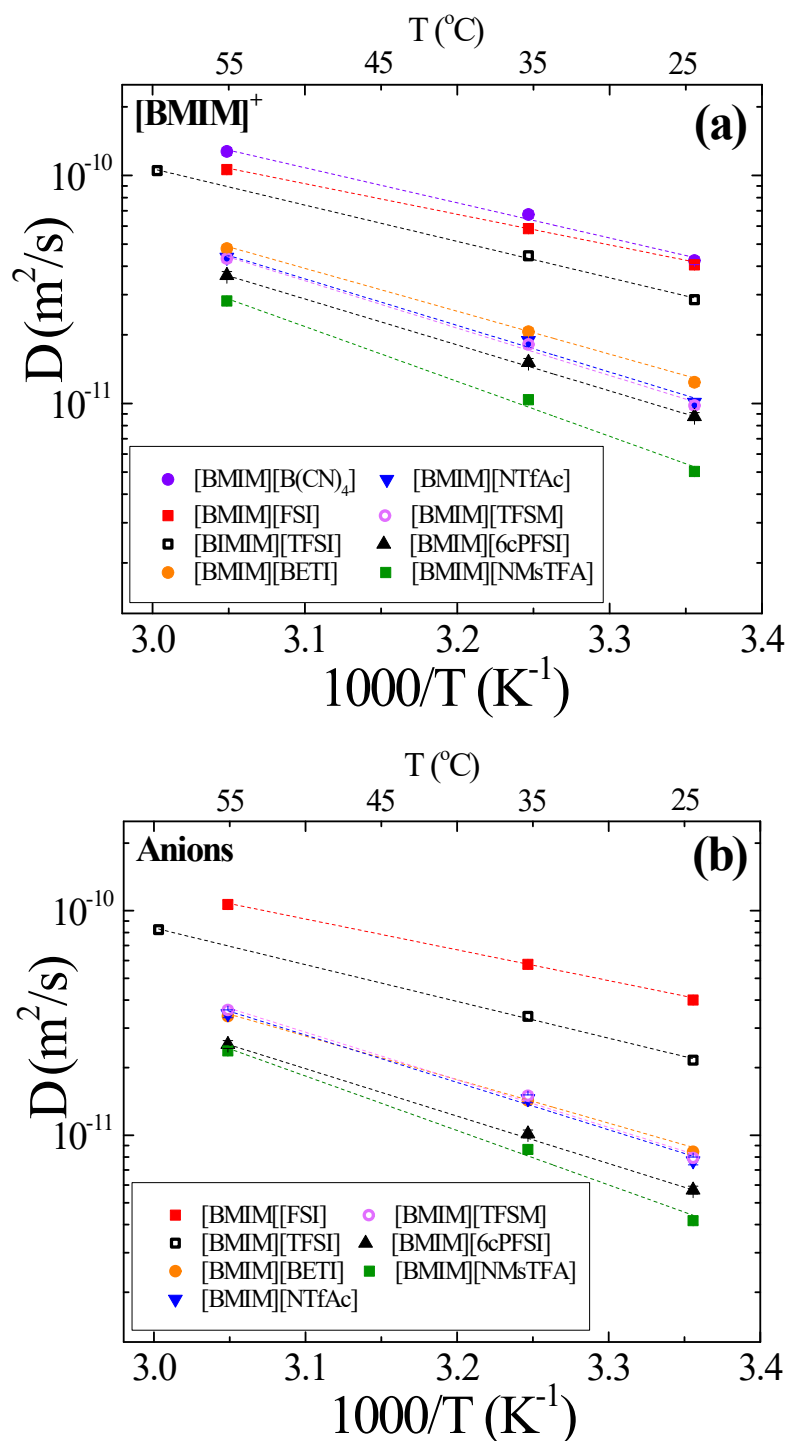

**Figure S1.** Temperature dependence of self-diffusion coefficients of (a) the [BMIM]<sup>+</sup> cation and (b) the anions ([FSI]<sup>-</sup>, [BETI]<sup>-</sup>, [NTfAc]<sup>-</sup>, [TFSM]<sup>-</sup>, [6cPFSI]<sup>-</sup> and [NMsTFA]<sup>-</sup>) in the ILs. Self-diffusion coefficients for [BMIM]<sup>+</sup> and [TFSI]<sup>-</sup> in [BMIM][TFSI] are included for comparison purposes and the values at 60°C are taken with permission from reference (20). Lines represent the linear fittings of the data using an Arrhenius equation.

**Table S1.** Self-diffusion coefficients ( $D$ ) for  $[\text{BMIM}]^+$  ( $^1\text{H}$ ) and the anions ( $^{19}\text{F}$ ) in all studied ILs, at 25, 35 and 55°C.

| Temperature (°C) | $D$ [ $\text{m}^2/\text{s}$ ] $\times 10^{-12}$ |                 |                |                 |               |                 |                |                 |              |                 |              |                 |                             |              |                 |
|------------------|-------------------------------------------------|-----------------|----------------|-----------------|---------------|-----------------|----------------|-----------------|--------------|-----------------|--------------|-----------------|-----------------------------|--------------|-----------------|
|                  | [BMIM][TFSM]                                    |                 | [BMIM][NMsTFA] |                 | [BMIM][NTfAc] |                 | [BMIM][6cPFSI] |                 | [BMIM][BETI] |                 | [BMIM][FSI]  |                 | [BMIM][B(CN) <sub>4</sub> ] | [BMIM][TFSI] |                 |
|                  | $^1\text{H}$                                    | $^{19}\text{F}$ | $^1\text{H}$   | $^{19}\text{F}$ | $^1\text{H}$  | $^{19}\text{F}$ | $^1\text{H}$   | $^{19}\text{F}$ | $^1\text{H}$ | $^{19}\text{F}$ | $^1\text{H}$ | $^{19}\text{F}$ | $^1\text{H}$                | $^1\text{H}$ | $^{19}\text{F}$ |
| 25               | 9.8<br>±0.4                                     | 7.9<br>±0.3     | 5.0<br>±0.2    | 4.1<br>±0.2     | 10.1±<br>0.4  | 7.7<br>±0.3     | 8.8<br>±0.3    | 5.7<br>±0.2     | 12.4<br>±0.5 | 8.5<br>±0.2     | 40.5<br>±1   | 40<br>±2        | 42<br>±1                    | 28.5<br>±1   | 21.6<br>±0.9    |
| 35               | 18.0<br>±0.7                                    | 15.0<br>±0.6    | 10.4<br>±0.4   | 8.6<br>±0.3     | 18.9<br>±0.7  | 14.5<br>±0.6    | 15.2<br>±0.6   | 10.1<br>±0.4    | 20.6<br>±0.8 | 14.3<br>±0.6    | 58.5<br>±2   | 57.7<br>±2      | 67.4<br>±2                  | 44.4<br>±2   | 33.8<br>±1      |
| 55               | 43<br>±1                                        | 36<br>±1        | 28.1<br>±1     | 23.7<br>±0.9    | 43.8<br>±1    | 34.8<br>±1      | 36.4<br>±1     | 25.4<br>±1      | 47.8<br>±2   | 34<br>±1        | 106<br>±4    | 106.5<br>±4     | 128<br>±5                   | -----        | -----           |

## 2. Dispersions of the longitudinal relaxation rate

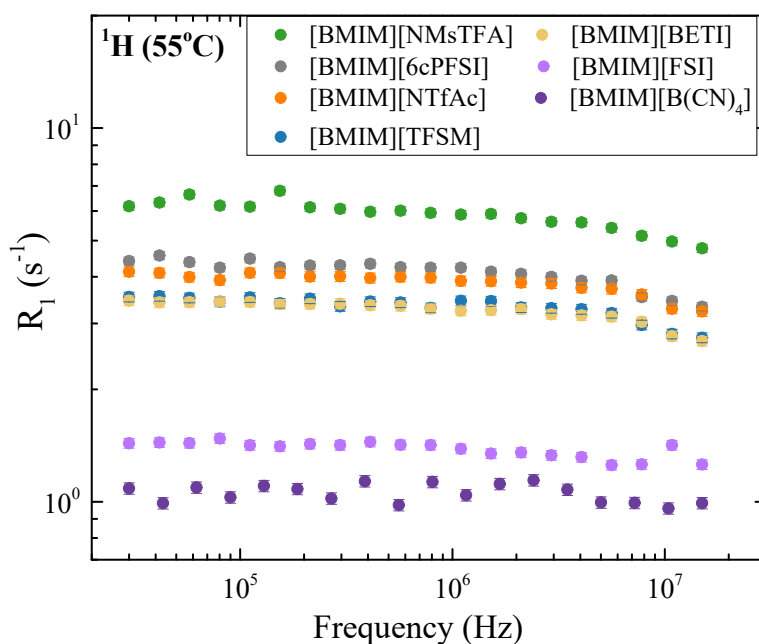

**Figure S2.**  $^1\text{H}$  relaxation rate dispersions for  $[\text{BMIM}][\text{NMsTFA}]$ ,  $[\text{BMIM}][6\text{cPFSI}]$ ,  $[\text{BMIM}][\text{NTfAc}]$ ,  $[\text{BMIM}][\text{TFSM}]$ ,  $[\text{BMIM}][\text{BETI}]$ ,  $[\text{BMIM}][\text{FSI}]$ , and  $[\text{BMIM}][\text{B}(\text{CN})_4]$ , recorded at 55°C. Frequencies are  $^1\text{H}$  Larmor frequencies.

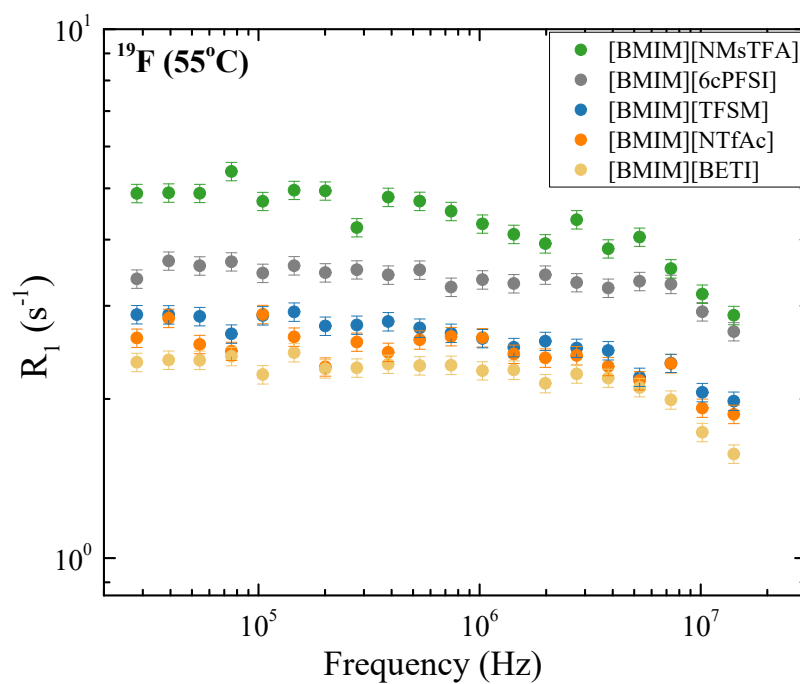

**Figure S3.**  $^{19}\text{F}$  relaxation rate dispersions for [BMIM][NMsTFA], [BMIM][6cPFSI], [BMIM][TFSM], [BMIM][NTfAc], and [BMIM][BETI], recorded at  $55^\circ\text{C}$ . Due to the low signal-to-noise ratio, collecting anion dispersion data was impossible for [BMIM][FSI]. Frequencies are  $^{19}\text{F}$  Larmor frequencies.

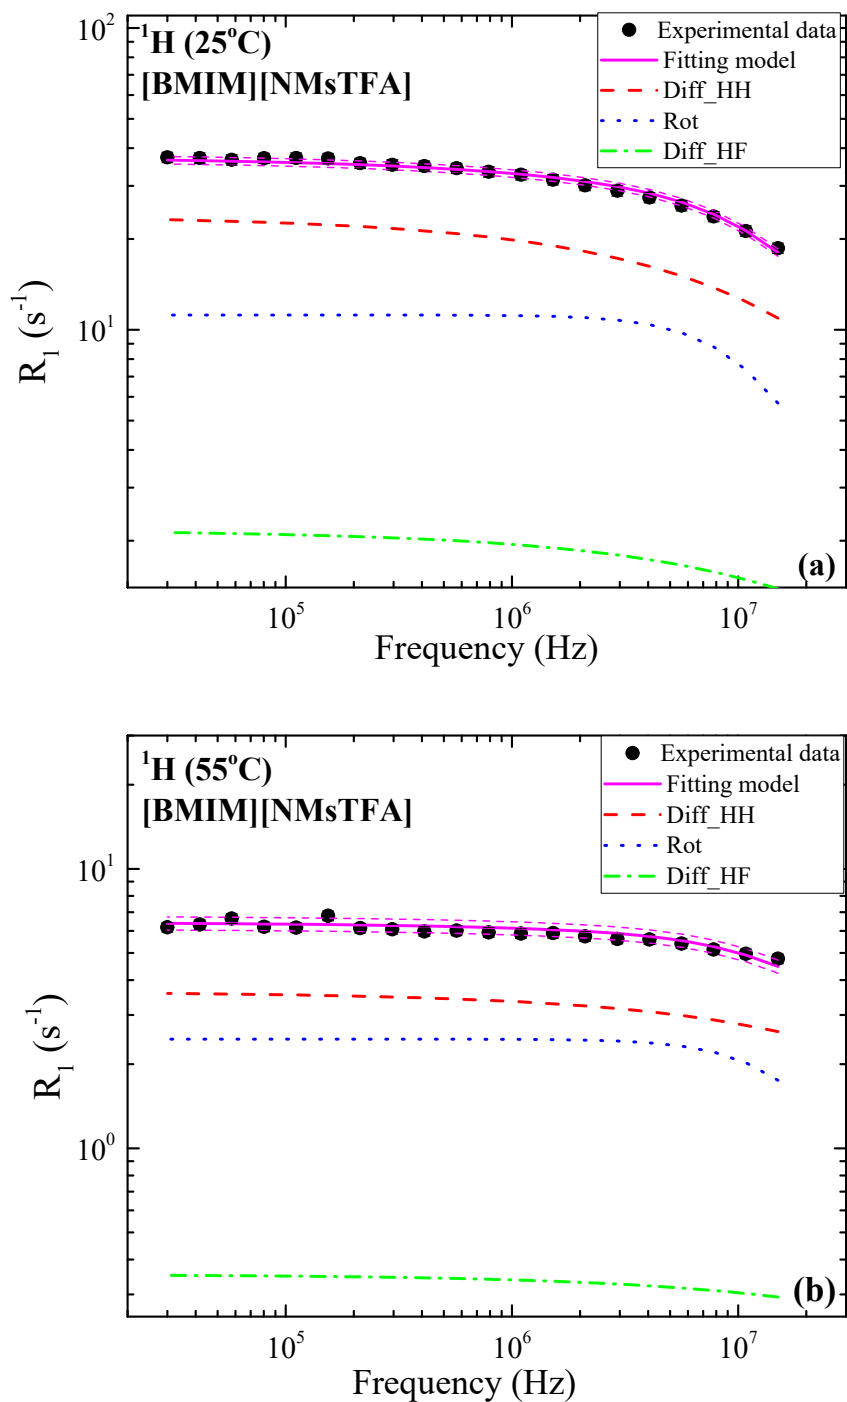

**Figure S4.**  $^1\text{H}$  relaxation rate dispersions for [BMIM][NMsTFA] and their corresponding fittings using the model given by Eq. (7), recorded at  $25^\circ\text{C}$  (a) and  $55^\circ\text{C}$  (b). Additionally, rotational contribution (Rot), and homonuclear (Diff\_HH), and heteronuclear (Diff\_HF) translational contributions are shown. Magenta dashed lines represent the fitting error. Frequencies are  $^1\text{H}$  Larmor frequencies.

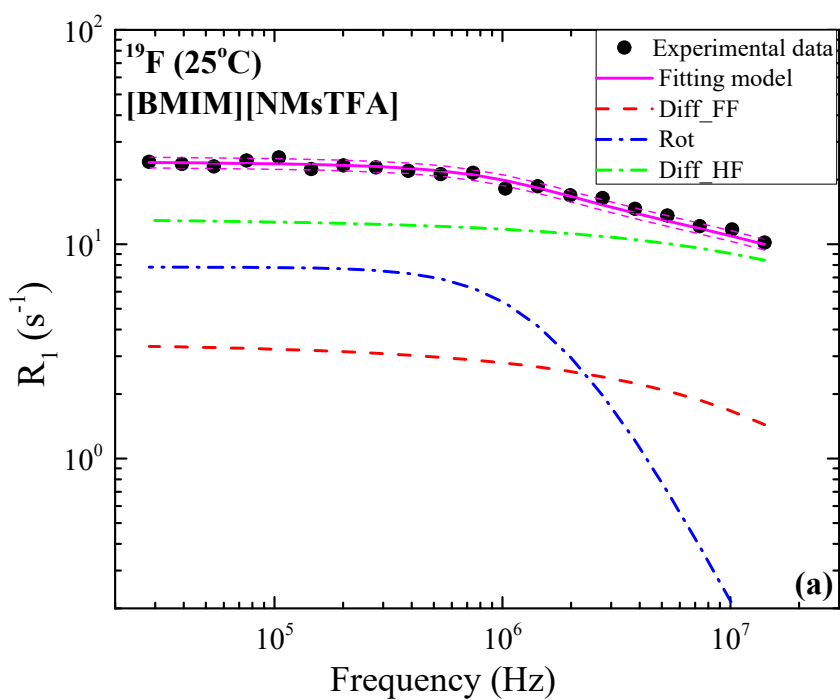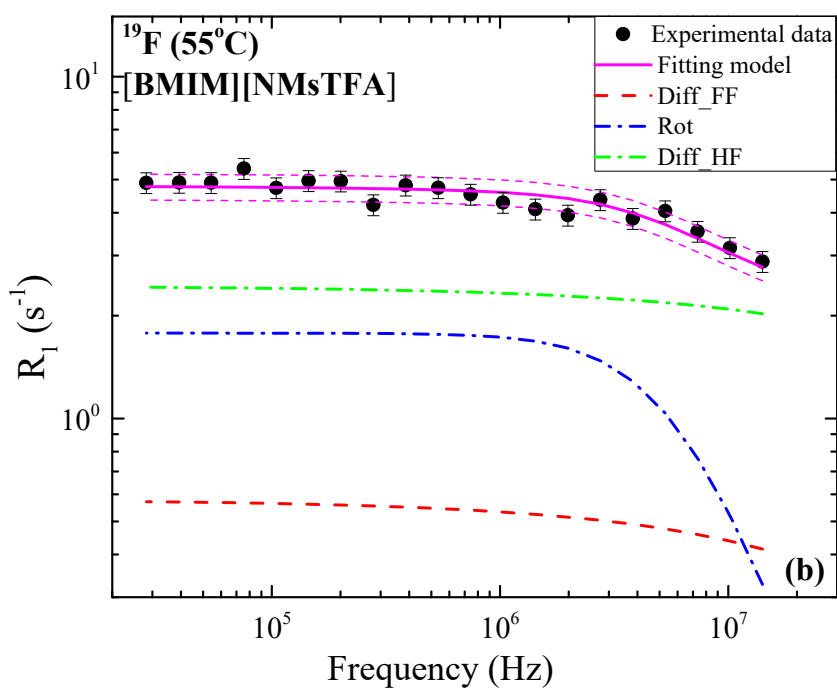

**Figure S5.**  $^{19}\text{F}$  relaxation rate dispersions for [BMIM][NMsTFA] and their corresponding fittings using the model given by Eq. (7), recorded at 25°C (a) and 55°C (b). Additionally, rotational contribution (Rot), homonuclear (Diff\_FF), and heteronuclear (Diff\_HF) translational contributions are shown. Magenta dashed lines represent the fitting error. Frequencies are  $^{19}\text{F}$  Larmor frequencies.

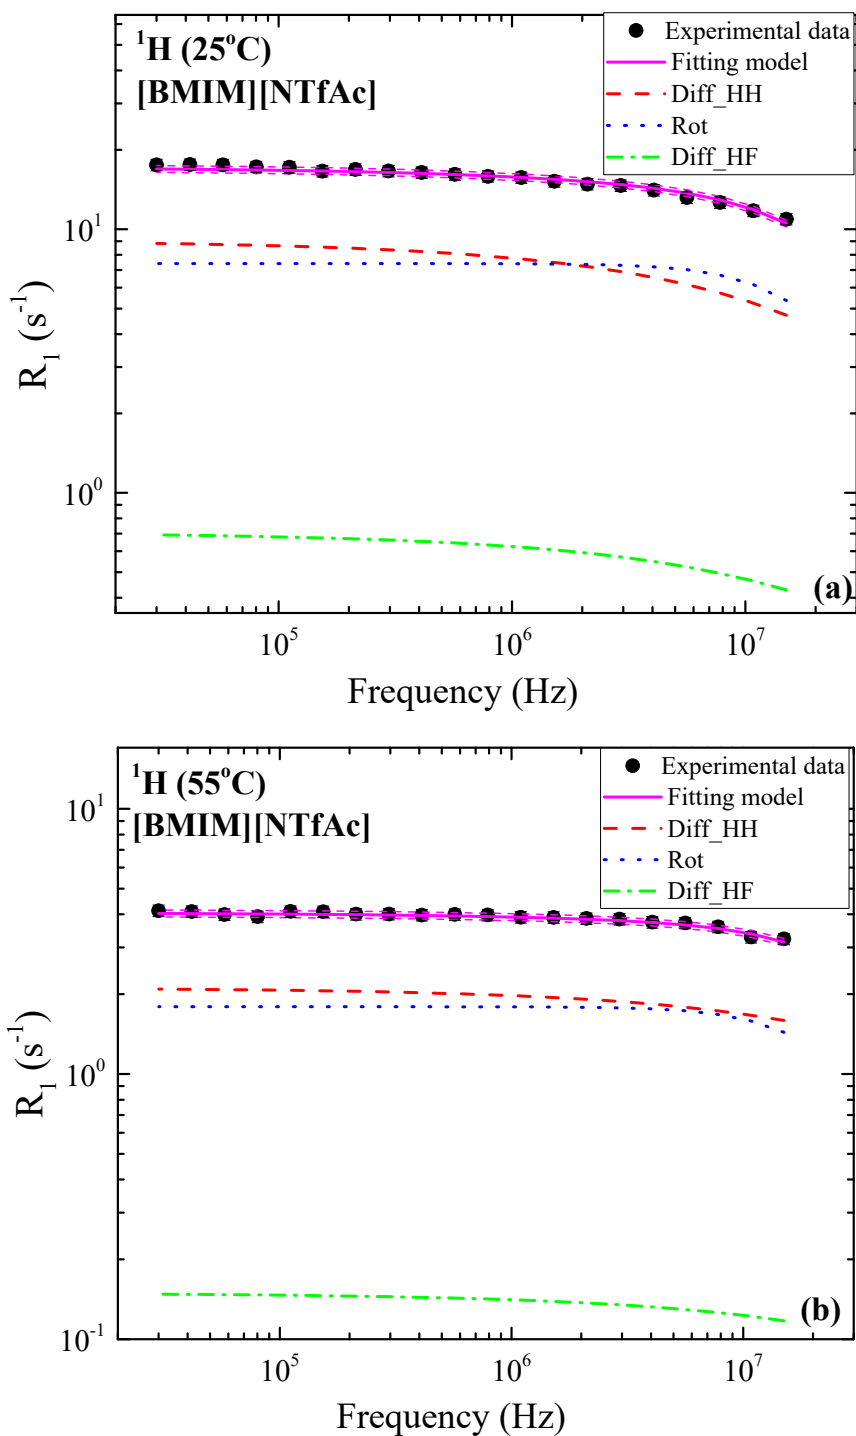

**Figure S6.**  $^1\text{H}$  relaxation rate dispersions for [BMIM][NTfAc] and their corresponding fittings using the model given by Eq. (7), recorded at  $25^\circ\text{C}$  (a) and  $55^\circ\text{C}$  (b). Additionally, rotational contribution (Rot), homonuclear (Diff\_HH), and heteronuclear (Diff\_HF) translational contributions are shown. Magenta dashed lines represent the fitting error. Frequencies are  $^1\text{H}$  Larmor frequencies.

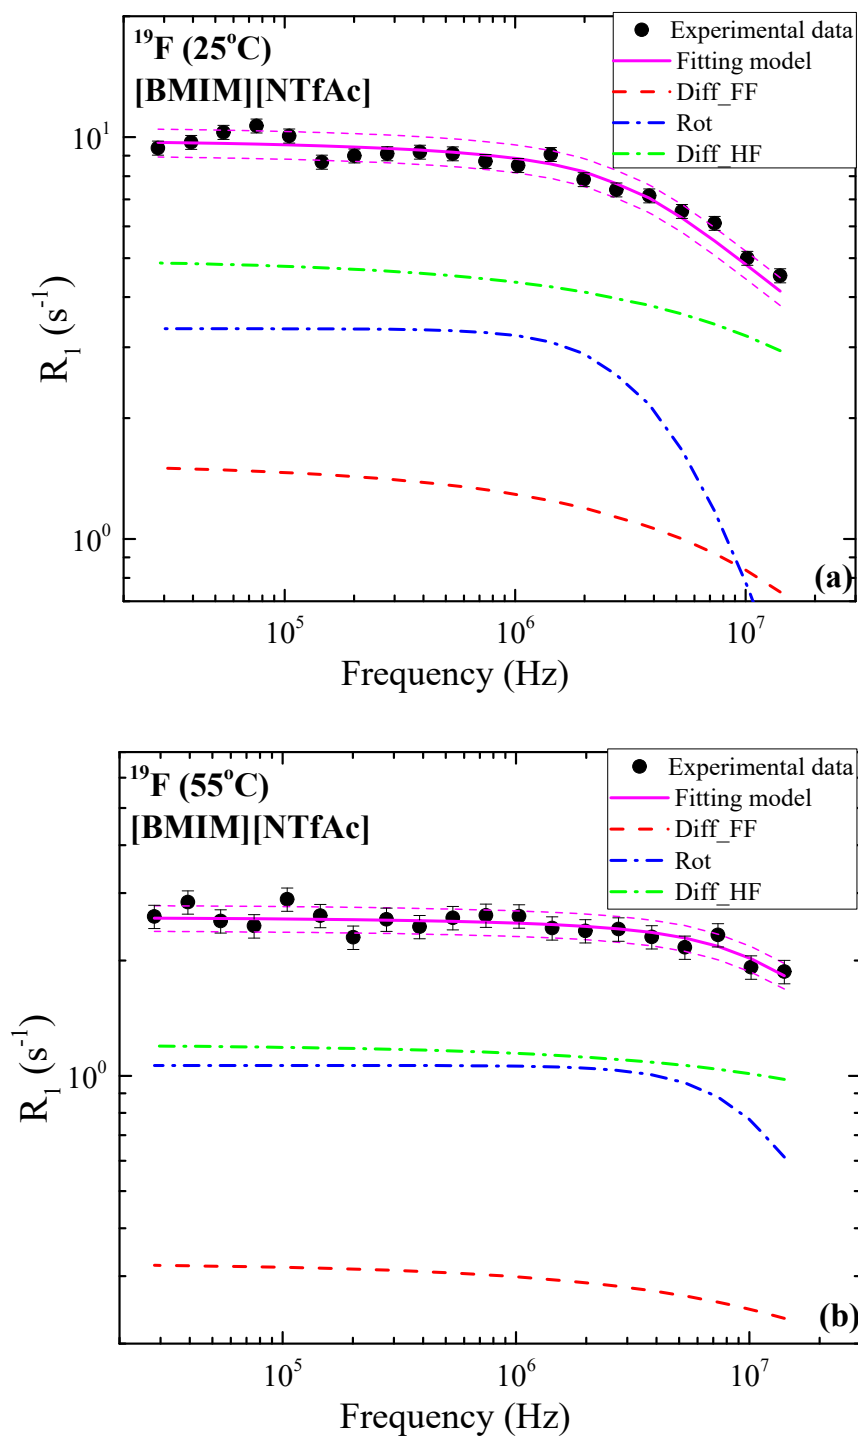

**Figure S7.** <sup>19</sup>F relaxation rate dispersions for [BMIM][NTfAc] and their corresponding fittings using the model given by Eq. (7), recorded at 25°C (a) and 55°C (b). Additionally, rotational contribution (Rot), homonuclear (Diff\_HH), and heteronuclear (Diff\_HF) translational contributions are shown. Magenta dashed lines represent the fitting error. Frequencies are <sup>19</sup>F Larmor frequencies.



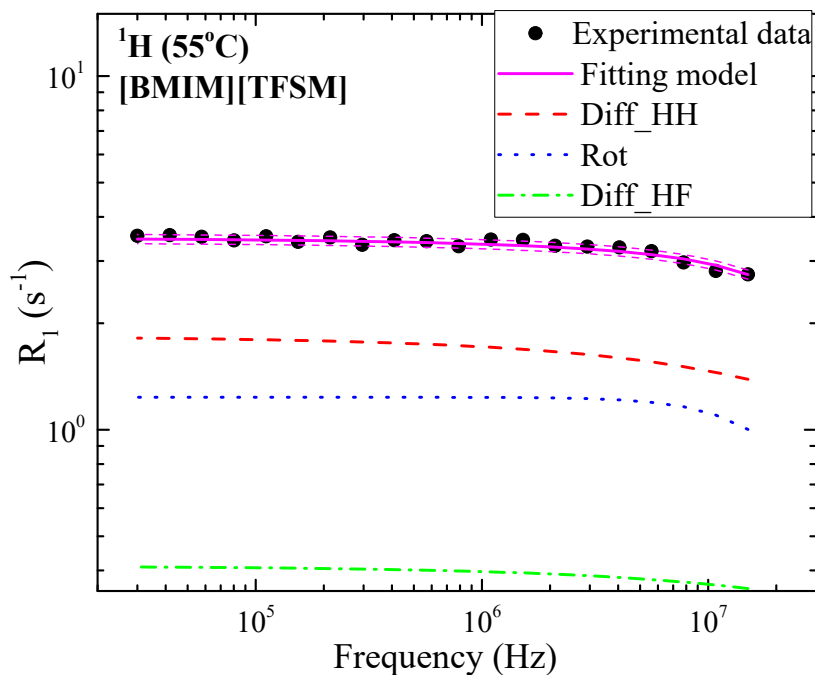

**Figure S8.**  $^1\text{H}$  relaxation rate dispersion for [BMIM][TFSM] and its corresponding fitting using the model given by Eq. (7), recorded at 55°C. Additionally, rotational contribution (Rot), homonuclear (Diff\_HH), and heteronuclear (Diff\_HF) translational contributions are shown. Magenta dashed lines represent the fitting error. Frequencies are  $^1\text{H}$  Larmor frequencies.

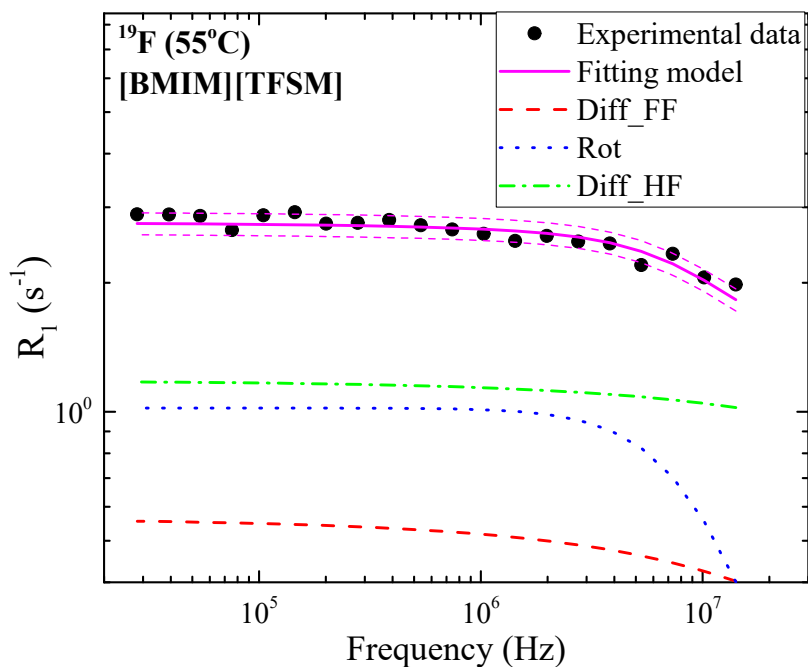

**Figure S9.**  $^{19}\text{F}$  relaxation rate dispersion for [BMIM][TFSM] and its corresponding fitting using the model given by Eq. (7), recorded 55°C. Additionally, rotational contribution (Rot),

homonuclear (Diff\_HH), and heteronuclear (Diff\_HF) translational contributions are shown. Magenta dashed lines represent the fitting error. Frequencies are  $^{19}\text{F}$  Larmor frequencies.

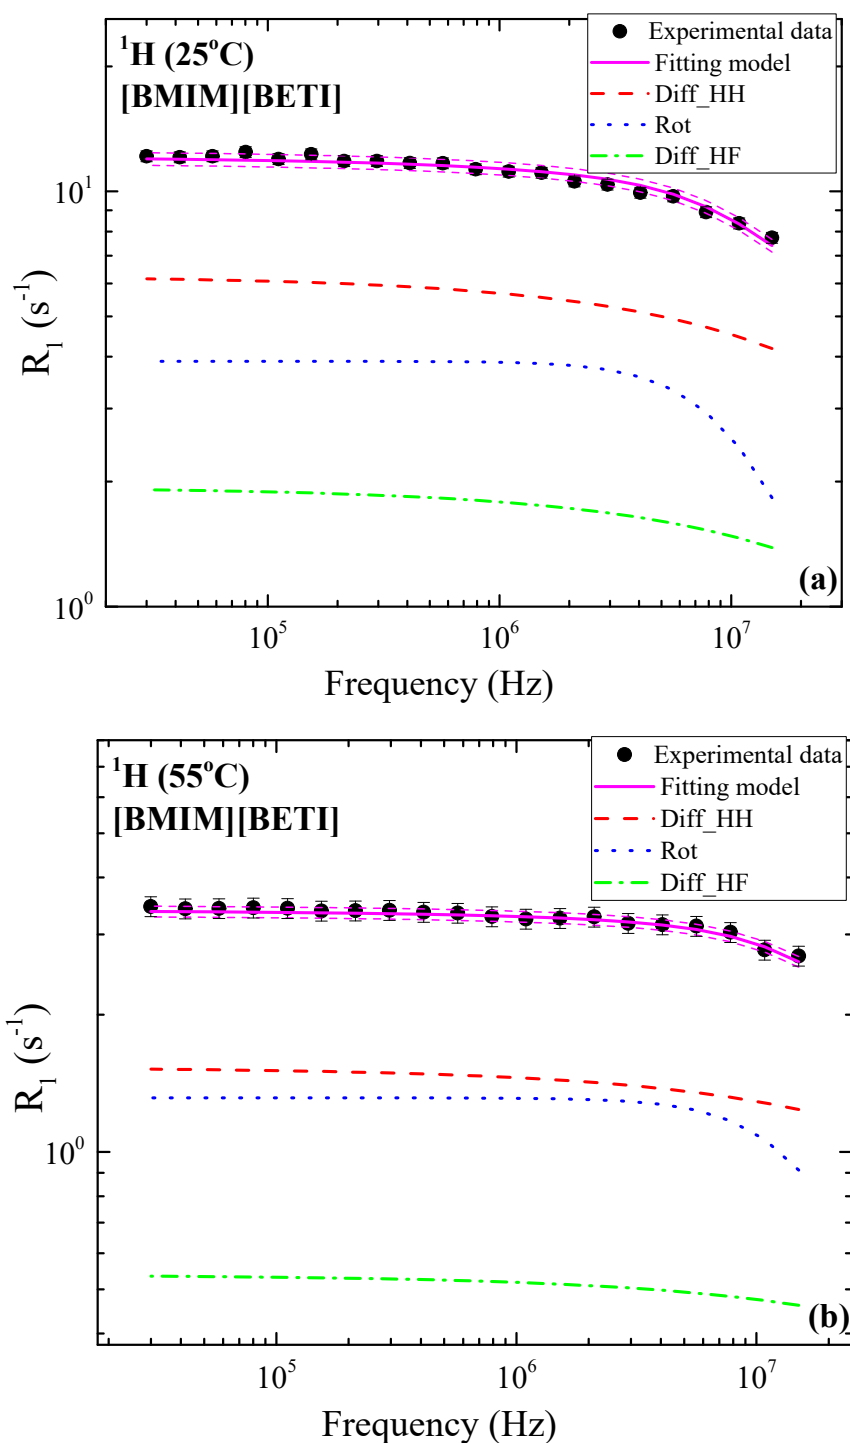

**Figure S10.**  $^1\text{H}$  relaxation rate dispersions for [BMIM][BETI] and their corresponding fittings using the model given by Eq. (7), recorded at  $25^\circ\text{C}$  (a) and  $55^\circ\text{C}$  (b). Additionally, rotational contribution (Rot), homonuclear (Diff\_HH), and heteronuclear (Diff\_HF) translational

contributions are shown. Magenta dashed lines represent the fitting error. Frequencies are  $^1\text{H}$  Larmor frequencies.

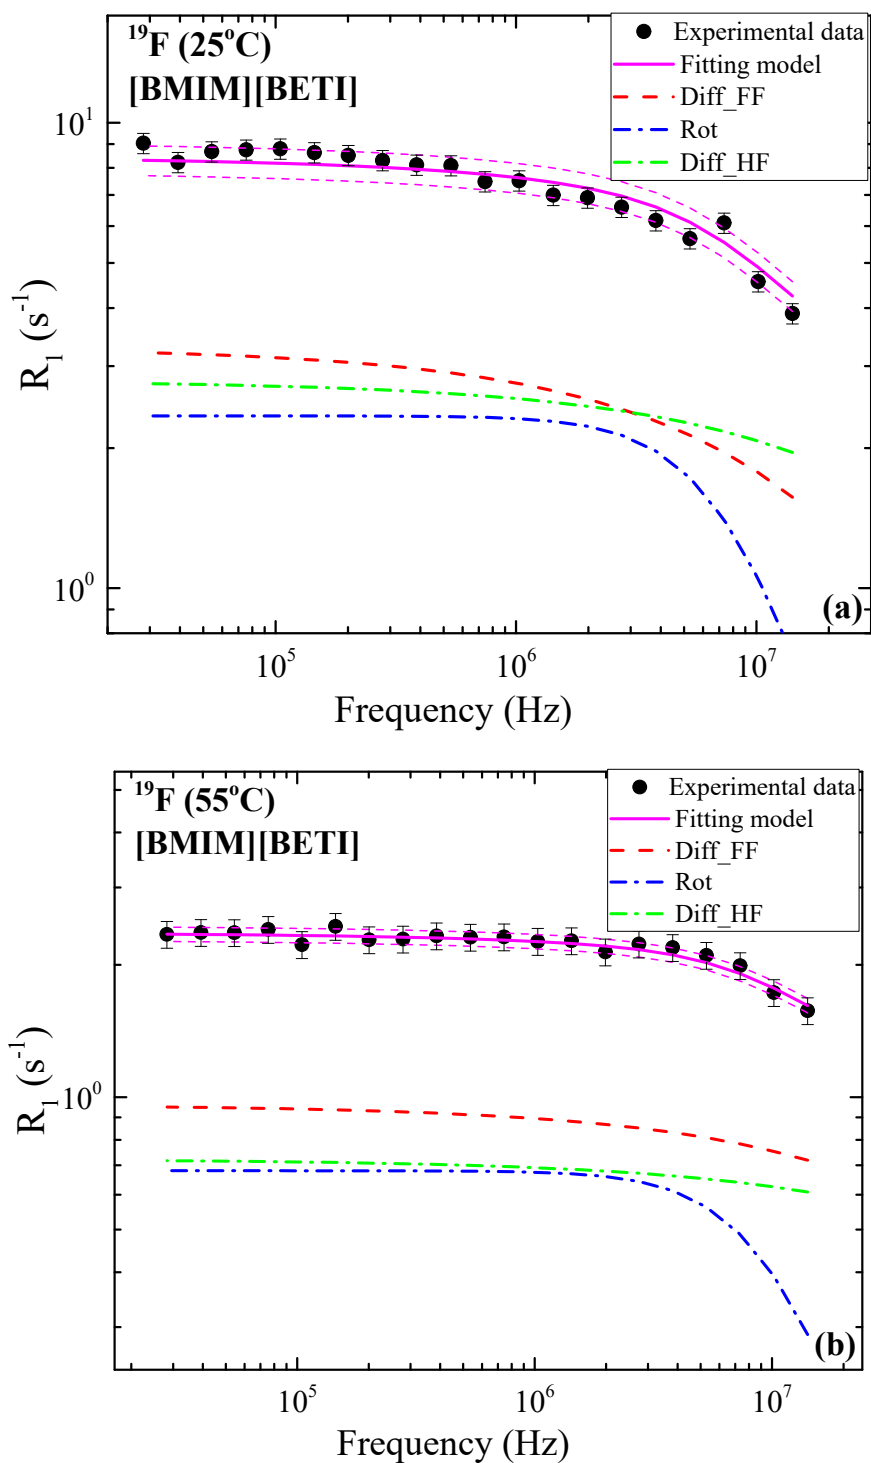

**Figure S11.**  $^{19}\text{F}$  relaxation rate dispersions for [BMIM][BETI] and their corresponding fittings using the model given by Eq. (7), recorded at 25°C (a) and 55°C (b). Additionally, rotational contribution (Rot), homonuclear (Diff\_HH), and heteronuclear (Diff\_HF)

translational contributions are shown. Magenta dashed lines represent the fitting error. Frequencies are  $^{19}\text{F}$  Larmor frequencies.

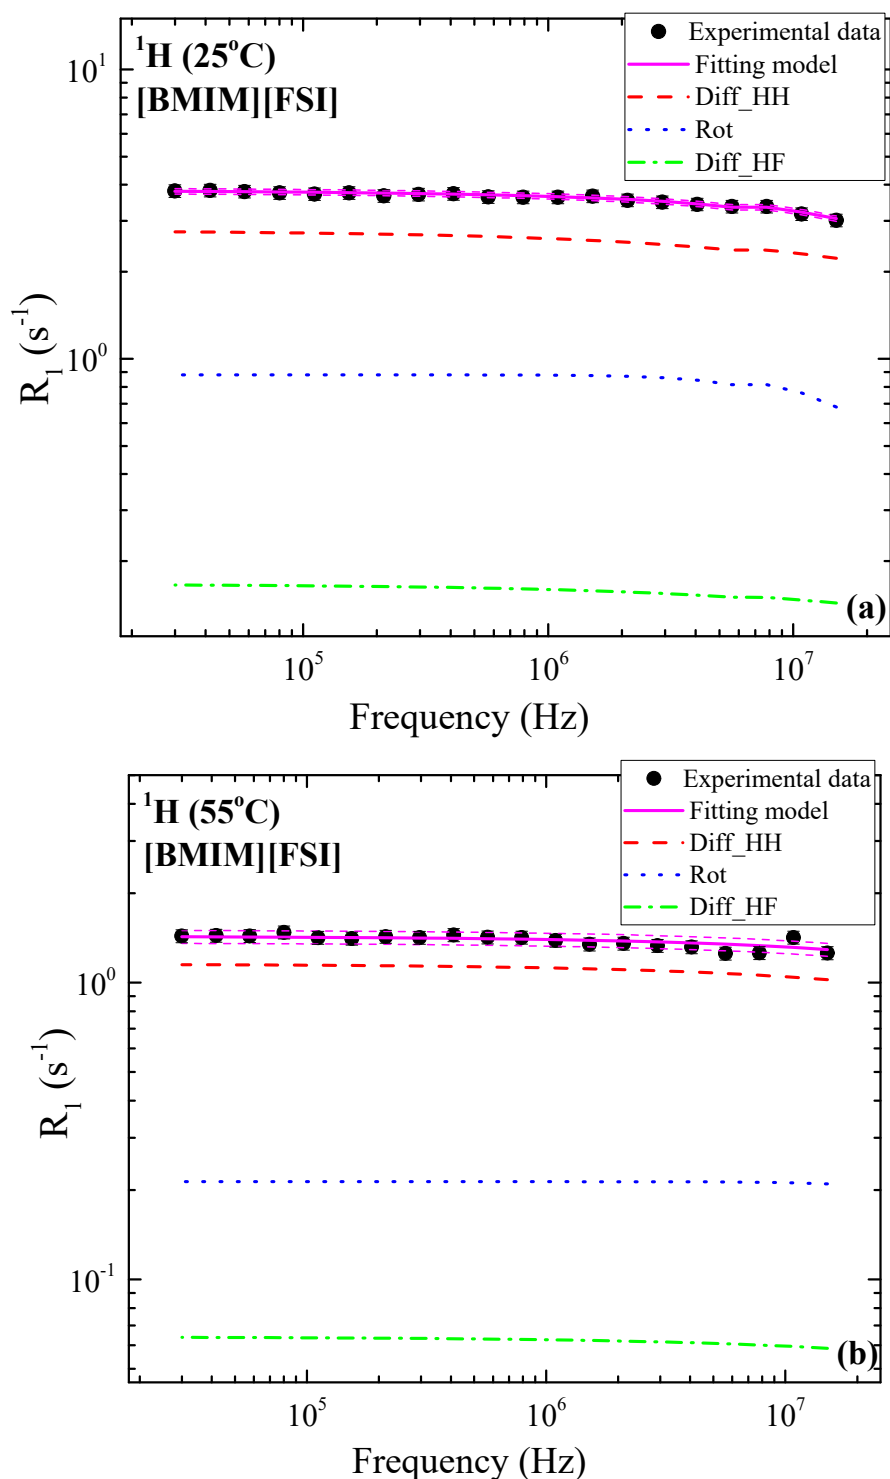

**Figure S12.**  $^1\text{H}$  relaxation rate dispersions for [BMIM][FSI] and their corresponding fittings using the model given by Eq. (7), recorded at  $25^\circ\text{C}$  (a) and  $55^\circ\text{C}$  (b). Additionally, rotational contribution (Rot), homonuclear (Diff\_HH), and heteronuclear (Diff\_HF) translational

contributions are shown. Magenta dashed lines represent the fitting error. Frequencies are  $^1\text{H}$  Larmor frequencies.

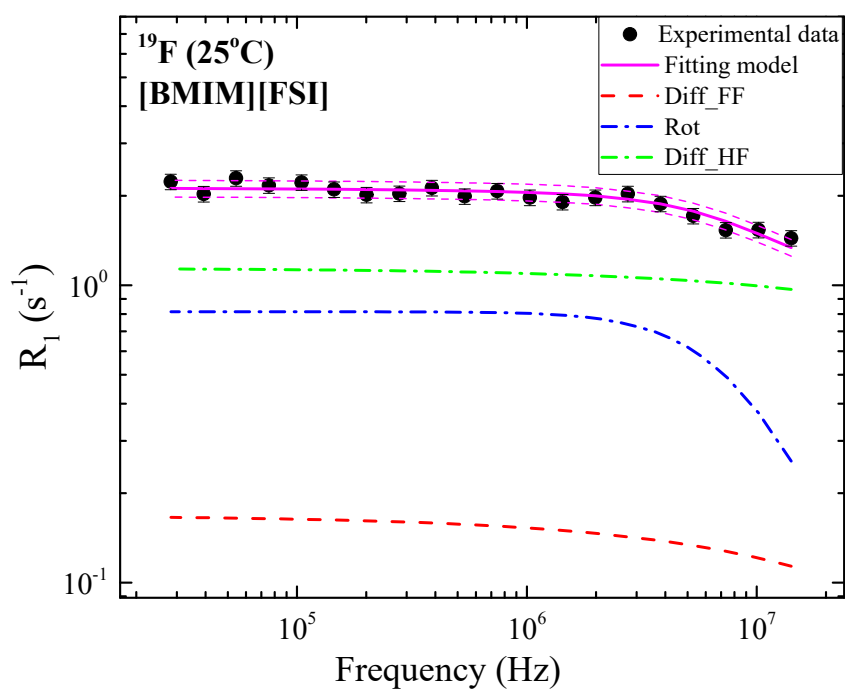

**Figure S13.**  $^{19}\text{F}$  relaxation rate dispersions for [BMIM][FSI] and their corresponding fittings using the model given by Eq. (7), recorded at 25°C. Additionally, rotational contribution (Rot), homonuclear (Diff\_HH), and heteronuclear (Diff\_HF) translational contributions are shown. Due to the low signal-to-noise ratio, collecting anion dispersion data was impossible at 55°C. Magenta dashed lines represent the fitting error. Frequencies are  $^{19}\text{F}$  Larmor frequencies.

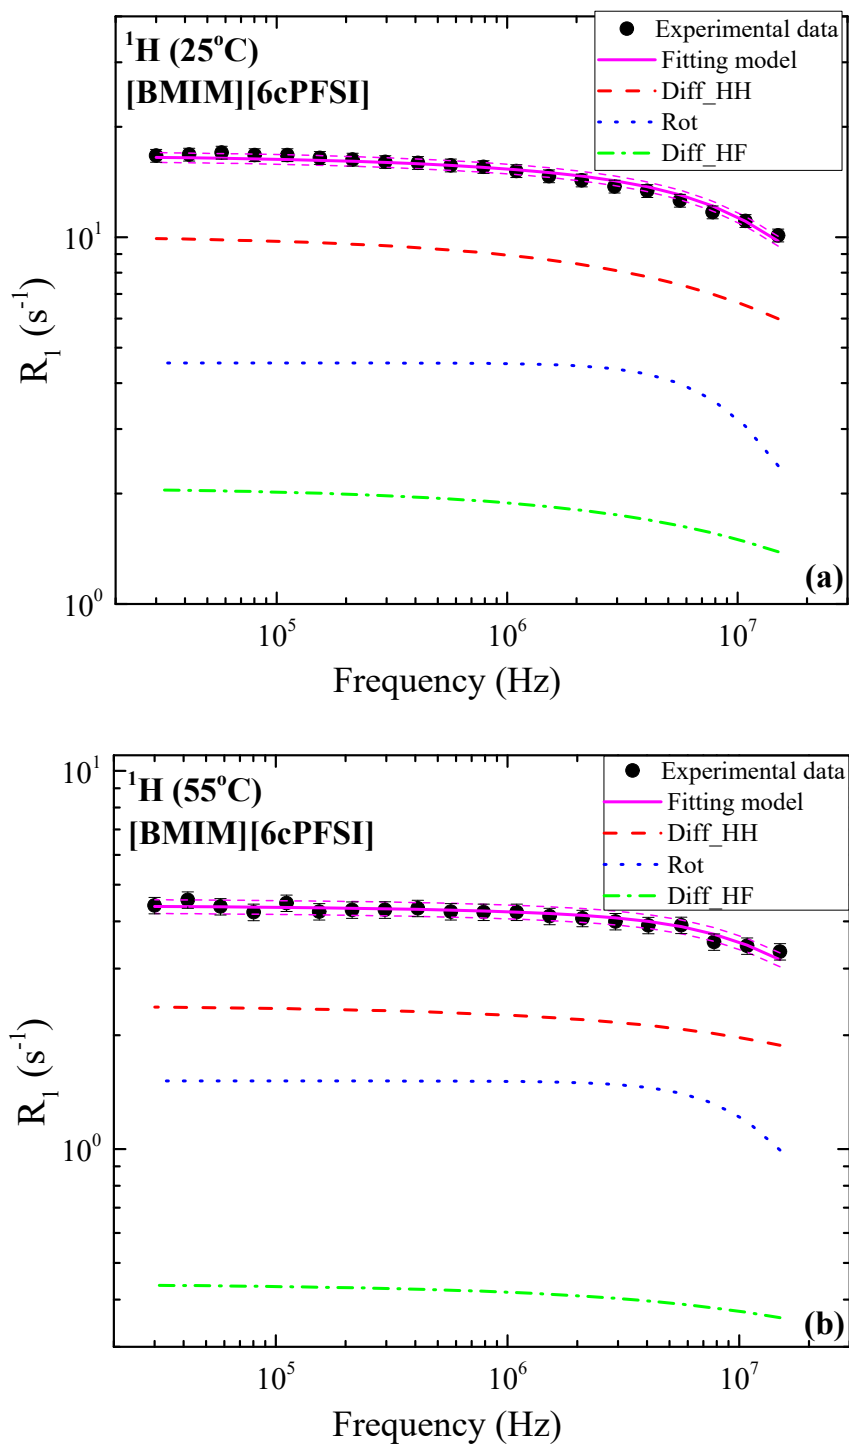

**Figure S14.**  $^1\text{H}$  relaxation rate dispersions for [BMIM][6cPFSI] and their corresponding fittings using the model given by Eq. (7), recorded at  $25^\circ\text{C}$  (a) and  $55^\circ\text{C}$  (b). Additionally, rotational contribution (Rot), homonuclear (Diff\_HH), and heteronuclear (Diff\_HF) translational contributions are shown. Magenta dashed lines represent the fitting error. Frequencies are  $^1\text{H}$  Larmor frequencies.

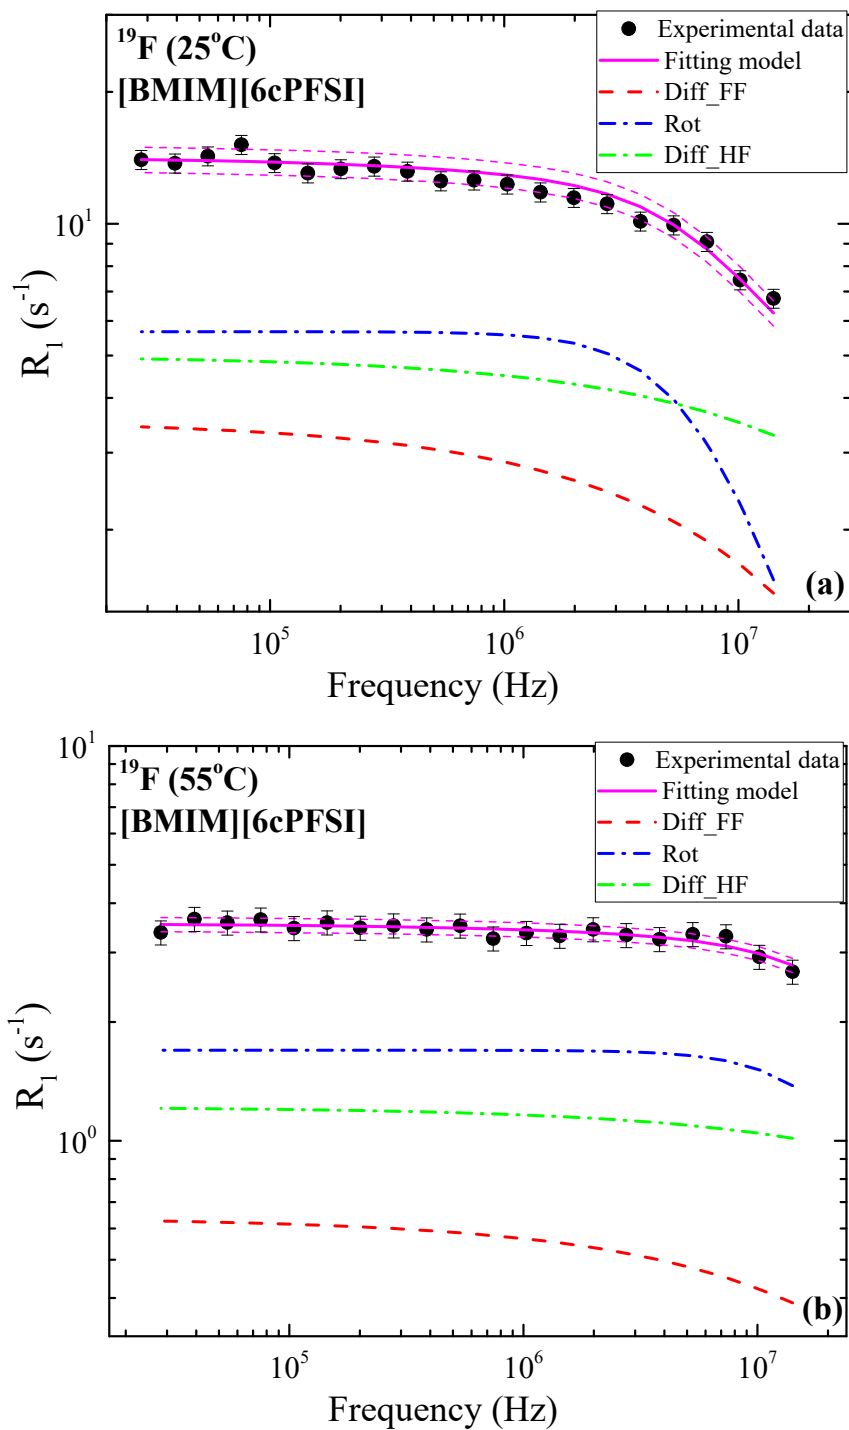

**Figure S15.** <sup>19</sup>F relaxation rate dispersions for [BMIM][6cPFSI] and their corresponding fittings using the model given by Eq. (7), recorded at 25°C (a) and 55°C (b). Additionally, rotational contribution (Rot), homonuclear (Diff\_HH), and heteronuclear (Diff\_HF) translational contributions are shown. Magenta dashed lines represent the fitting error. Frequencies are <sup>19</sup>F Larmor frequencies.

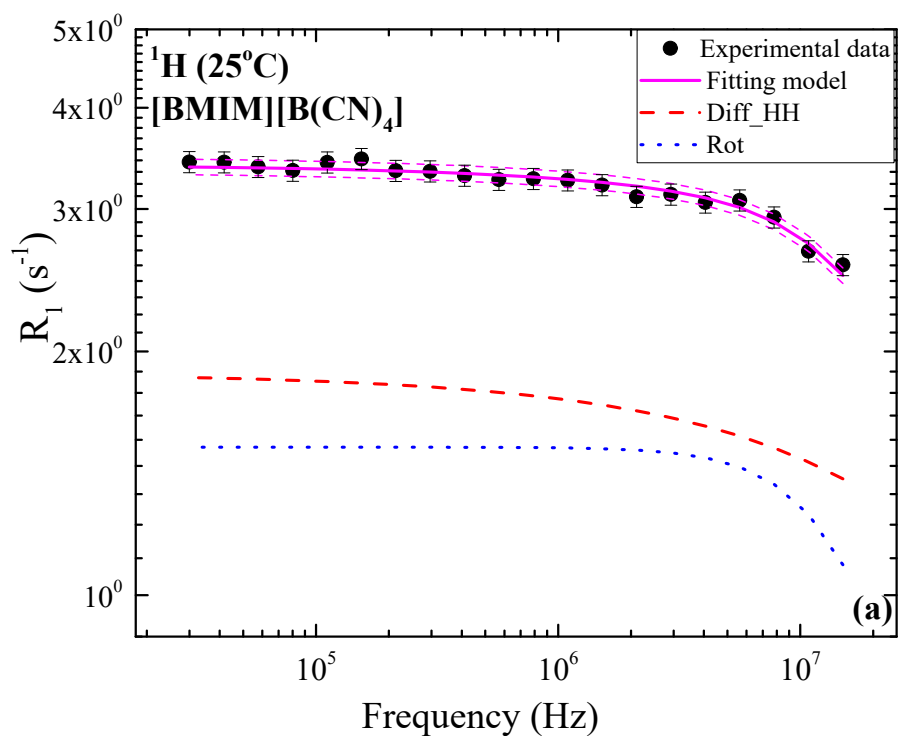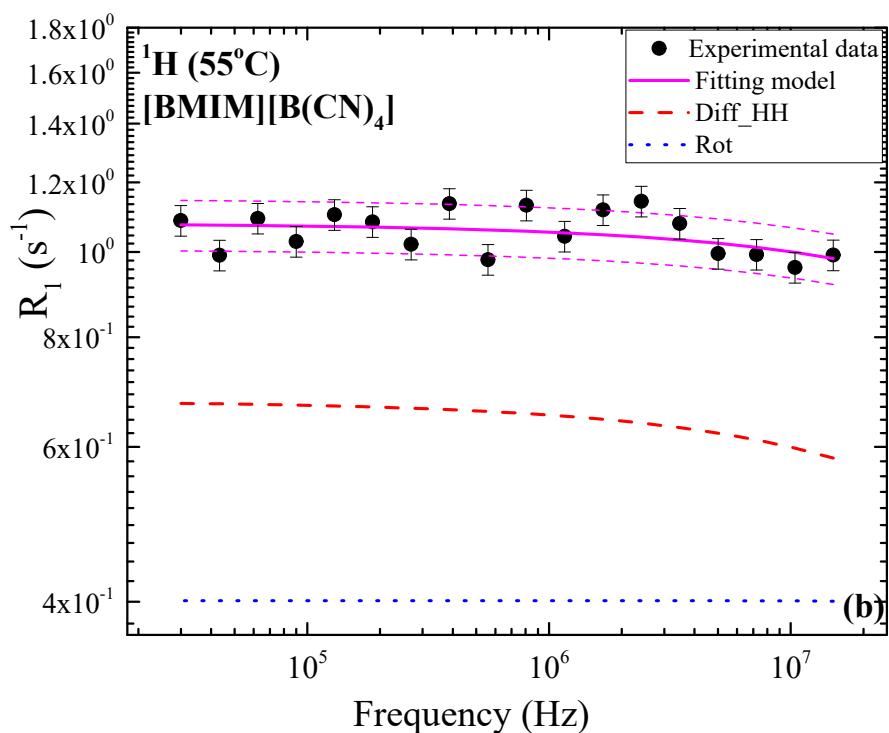

**Figure S16.** <sup>1</sup>H relaxation rate dispersions for [BMIM][B(CN)<sub>4</sub>] and their corresponding fittings using the model given by Eq. (7), recorded at 25°C (a) and 55°C (b). Rotational contribution (Rot), and homonuclear (Diff\_HH) translational contribution are also shown. Magenta dashed lines represent the fitting error. Frequencies are <sup>1</sup>H Larmor frequencies.



### 3. Fitting parameters for the relaxation dispersions

**Table S2.** Parameters obtained using the model given by Eq. (7) to describe the longitudinal relaxation rate profiles for [BMIM]<sup>+</sup> (<sup>1</sup>H) and the anions (<sup>19</sup>F) of all studied ILs, at 25°C.

| Parameters                                  | [BMIM]<br>[TFSM] |                  | [BMIM]<br>[NMsTFA] |                  | [BMIM]<br>[NTfAc] |                    | [BMIM]<br>[6cPFSI] |                   | [BMIM]<br>[BETI]   |                    | [BMIM]<br>[FSI]    |                    | [BMIM]<br>[B(CN) <sub>4</sub> ] |
|---------------------------------------------|------------------|------------------|--------------------|------------------|-------------------|--------------------|--------------------|-------------------|--------------------|--------------------|--------------------|--------------------|---------------------------------|
|                                             | <sup>1</sup> H   | <sup>19</sup> F  | <sup>1</sup> H     | <sup>19</sup> F  | <sup>1</sup> H    | <sup>19</sup> F    | <sup>1</sup> H     | <sup>19</sup> F   | <sup>1</sup> H     | <sup>19</sup> F    | <sup>1</sup> H     | <sup>19</sup> F    | <sup>1</sup> H                  |
| $d_{HH}$ [m] $\times 10^{-10}$              | 3.4<br>$\pm 0.2$ | -----            | 3.0<br>$\pm 0.1$   | -----            | 3.7<br>$\pm 0.2$  | -----              | 2.8<br>$\pm 0.1$   | -----             | 2.7<br>$\pm 0.1$   | -----              | 2.7<br>$\pm 0.1$   | -----              | 3.6<br>$\pm 0.1$                |
| $d_{FF}$ [m] $\times 10^{-10}$              | -----            | 3.6<br>$\pm 0.1$ | -----              | 3.1<br>$\pm 0.2$ | -----             | 3.7<br>$\pm 0.2$   | -----              | 3.8<br>$\pm 0.2$  | -----              | 3.9<br>$\pm 0.2$   | -----              | 4.7<br>$\pm 0.2$   | -----                           |
| $d_{HF}$ [m] $\times 10^{-10}$              | 2.4<br>$\pm 0.1$ | 2.0<br>$\pm 0.2$ | 2.0<br>$\pm 0.1$   | 2.0<br>$\pm 0.1$ | 3.1<br>$\pm 0.2$  | 3.1<br>$\pm 0.1$   | 2.3<br>$\pm 0.1$   | 2.4<br>$\pm 0.1$  | 2.4<br>$\pm 0.1$   | 2.5<br>$\pm 0.1$   | 2.1<br>$\pm 0.1$   | 2.3<br>$\pm 0.1$   | -----                           |
| $D_H$ [m <sup>2</sup> /s] $\times 10^{-12}$ | 9.9<br>$\pm 0.1$ | 9.7<br>$\pm 0.3$ | 5.0<br>$\pm 0.1$   | 4.9<br>$\pm 0.2$ | 10.1<br>$\pm 0.3$ | 7.7<br>$\pm 0.8$   | 8.8<br>$\pm 0.1$   | 8.8<br>$\pm 0.2$  | 12.8<br>$\pm 0.2$  | 12.7<br>$\pm 0.2$  | 41<br>$\pm 2$      | 40<br>$\pm 1$      | 42<br>$\pm 1$                   |
| $D_F$ [m <sup>2</sup> /s] $\times 10^{-12}$ | 7.9<br>$\pm 0.3$ | 8.0<br>$\pm 0.2$ | 4.1<br>$\pm 0.1$   | 4.1<br>$\pm 0.1$ | 7.6<br>$\pm 0.3$  | 7.7<br>$\pm 0.2$   | 5.7<br>$\pm 0.2$   | 5.7<br>$\pm 0.1$  | 8.8<br>$\pm 0.2$   | 8.5<br>$\pm 0.3$   | 40<br>$\pm 1$      | 40<br>$\pm 3$      | -----                           |
| $A_R$ [1/s <sup>2</sup> ] $\times 10^8$     | 2.0<br>$\pm 0.1$ | 0.5<br>$\pm 0.1$ | 3.8<br>$\pm 0.2$   | 0.3<br>$\pm 0.1$ | 4.1<br>$\pm 0.1$  | 0.40<br>$\pm 0.05$ | 1.6<br>$\pm 0.1$   | 1.0<br>$\pm 0.1$  | 1.20<br>$\pm 0.08$ | 0.50<br>$\pm 0.03$ | 0.60<br>$\pm 0.04$ | 0.20<br>$\pm 0.04$ | 0.80<br>$\pm 0.05$              |
| $\tau_R$ [s] $\times 10^{-9}$               | 5.1<br>$\pm 0.2$ | 17<br>$\pm 1$    | 5.9<br>$\pm 0.3$   | 59<br>$\pm 3$    | 3.6<br>$\pm 0.2$  | 17<br>$\pm 1$      | 5.7<br>$\pm 0.3$   | 10.9<br>$\pm 0.7$ | 6.4<br>$\pm 0.3$   | 10.0<br>$\pm 0.5$  | 3.2<br>$\pm 0.1$   | 9.8<br>$\pm 0.5$   | 3.7<br>$\pm 0.2$                |

**Table S3.** Parameters obtained using the model given by Eq. (7) to describe the longitudinal relaxation rate profiles for [BMIM]<sup>+</sup> (<sup>1</sup>H) and the anions (<sup>19</sup>F) of all studied ILs, at 55°C.

| Parameters                                  | [BMIM]<br>[TFSM] |                    | [BMIM]<br>[NMsTFA] |                    | [BMIM]<br>[NTfAc] |                    | [BMIM]<br>[6cPFSI] |                  | [BMIM]<br>[BETI] |                    | [BMIM]<br>[FSI]    | [BMIM]<br>[B(CN) <sub>4</sub> ] |
|---------------------------------------------|------------------|--------------------|--------------------|--------------------|-------------------|--------------------|--------------------|------------------|------------------|--------------------|--------------------|---------------------------------|
|                                             | <sup>1</sup> H   | <sup>19</sup> F    | <sup>1</sup> H     | <sup>19</sup> F    | <sup>1</sup> H    | <sup>19</sup> F    | <sup>1</sup> H     | <sup>19</sup> F  | <sup>1</sup> H   | <sup>19</sup> F    | <sup>1</sup> H     | <sup>1</sup> H                  |
| $d_{HH}$ [m] $\times 10^{-10}$              | 3.4<br>$\pm 0.1$ | -----              | 3.2<br>$\pm 0.1$   | -----              | 3.5<br>$\pm 0.1$  | -----              | 2.8<br>$\pm 0.1$   | -----            | 2.8<br>$\pm 0.1$ | -----              | 2.5<br>$\pm 0.1$   | 3.3<br>$\pm 0.1$                |
| $d_{FF}$ [m] $\times 10^{-10}$              | -----            | 3.7<br>$\pm 0.2$   | -----              | 3.1<br>$\pm 0.2$   | -----             | 3.8<br>$\pm 0.2$   | -----              | 4.6<br>$\pm 0.3$ | -----            | 3.3<br>$\pm 0.1$   | -----              | -----                           |
| $d_{HF}$ [m] $\times 10^{-10}$              | 2.1<br>$\pm 0.1$ | 2.0<br>$\pm 0.1$   | 2.1<br>$\pm 0.1$   | 2.0<br>$\pm 0.1$   | 3.3<br>$\pm 0.2$  | 2.7<br>$\pm 0.2$   | 2.5<br>$\pm 0.1$   | 2.6<br>$\pm 0.1$ | 2.2<br>$\pm 0.1$ | 2.4<br>$\pm 0.1$   | 2.1<br>$\pm 0.1$   | -----                           |
| $D_H$ [m <sup>2</sup> /s] $\times 10^{-12}$ | 43<br>$\pm 1$    | 43<br>$\pm 1$      | 28<br>$\pm 3$      | 23<br>$\pm 3$      | 44<br>$\pm 2$     | 35<br>$\pm 3$      | 37<br>$\pm 1$      | 37<br>$\pm 2$    | 48<br>$\pm 1$    | 48<br>$\pm 1$      | 106<br>$\pm 3$     | 127<br>$\pm 2$                  |
| $D_F$ [m <sup>2</sup> /s] $\times 10^{-12}$ | 36<br>$\pm 1$    | 36<br>$\pm 2$      | 24<br>$\pm 2$      | 24<br>$\pm 1$      | 34<br>$\pm 3$     | 35<br>$\pm 1$      | 25<br>$\pm 1$      | 25<br>$\pm 2$    | 34<br>$\pm 1$    | 34<br>$\pm 1$      | 106<br>$\pm 4$     | -----                           |
| $A_R$ [1/s <sup>2</sup> ] $\times 10^8$     | 8.8<br>$\pm 0.2$ | 0.30<br>$\pm 0.05$ | 1.30<br>$\pm 0.05$ | 0.25<br>$\pm 0.02$ | 1.2<br>$\pm 0.1$  | 0.39<br>$\pm 0.07$ | 0.7<br>$\pm 0.1$   | 1<br>$\pm 0.1$   | 0.7<br>$\pm 0.1$ | 0.18<br>$\pm 0.02$ | 0.56<br>$\pm 0.08$ | 3.8<br>$\pm 0.2$                |
| $\tau_R$ [s] $\times 10^{-9}$               | 2.8<br>$\pm 0.2$ | 7.6<br>$\pm 0.4$   | 3.7<br>$\pm 0.2$   | 14<br>$\pm 1$      | 2.9<br>$\pm 0.1$  | 5.4<br>$\pm 0.3$   | 4.3<br>$\pm 0.2$   | 3.8<br>$\pm 0.2$ | 3.9<br>$\pm 0.2$ | 7.6<br>$\pm 0.3$   | 0.8<br>$\pm 0.2$   | 0.20<br>$\pm 0.01$              |
